# Supplementary material for: Chemical and biological studies of the dichloro(2-phenylpyridine) gold(iii) complex and its derivatives
Source: Royal Society of Chemistry journal article supplement (doi:10.1039/b303297c), 2003-01-01

# Chemical and Biological Studies of Dichloro(2-Phenylpyridine) Gold(III) Complex and Its Derivatives

Daming Fan, Chang-Tong Yang, \* John D. Ranford, \* Peng Foo Lee and Jagadese J. Vittal

*Department of Chemistry, National University of Singapore, Singapore 117543.*

## Electronic Supplementary Information:

Fig. S1.  $^1\text{H} - ^1\text{H}$  COSY spectrum of 5 in  $\text{DMSO}-d_6$

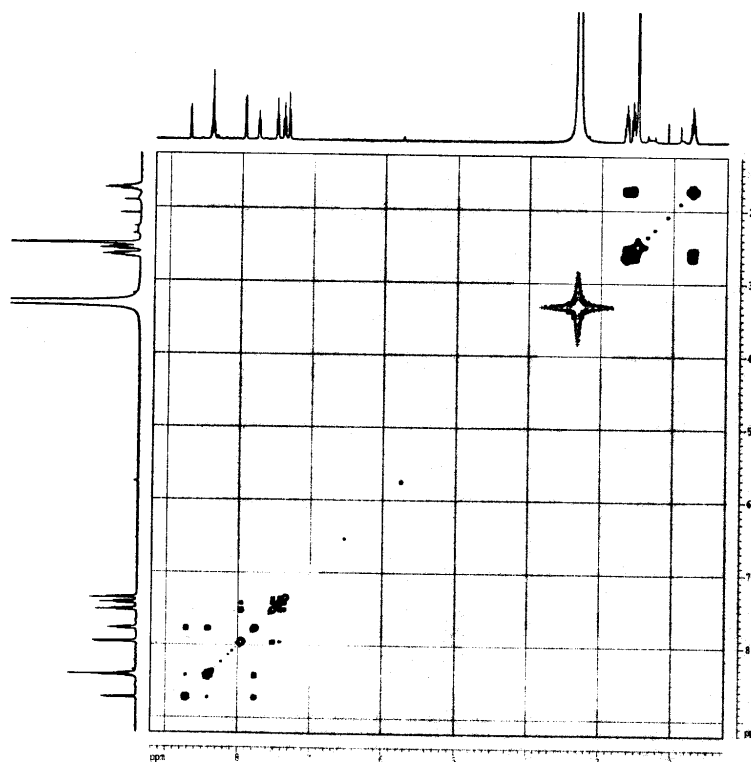

Supplement: b303297c.pdf [file b303297c.pdf]
